# Supplementary material
Source: HighWire-hosted journal article supplement (http://bmjopengastro.bmj.com/highwire/filestream/2381/field_highwire_adjunct_files/1/bmjgast-2020-000592supp002_data_supplement.pdf)
Supplement: bmjgast-2020-000592supp002_data_supplement.pdf [file bmjgast-2020-000592supp002_data_supplement.pdf]

Table S1: Overview of individual scores on AGREE II items by two reviewers

| AGREE II Domain            | AGREE II Item                                                                                                 | Reviewer<br>Guideline | R1  | R2  | R1  | R2  | R1   | R2   |
|----------------------------|---------------------------------------------------------------------------------------------------------------|-----------------------|-----|-----|-----|-----|------|------|
|                            |                                                                                                               |                       | SBH | SBH | ACG | ACG | EASL | EASL |
| 1: Scope & Purpose         | 1: The overall objective(s) of the guideline is (are) specifically described.                                 |                       | 5   | 4   | 6   | 6   | 6    | 5    |
|                            | 2: The health question(s) covered by the guideline is (are) specifically described.                           |                       | 1   | 4   | 5   | 5   | 6    | 6    |
|                            | 3: The population (patients, public, etc.) to whom the guideline is meant to apply is specifically described. |                       | 5   | 4   | 5   | 6   | 7    | 5    |
| 2: Stakeholder Involvement | 4: The guideline development group includes individuals from all relevant professional groups.                |                       | 5   | 4   | 3   | 6   | 6    | 7    |
|                            | 5: The views and preferences of the target population (patients, public, etc.) have been sought.              |                       | 1   | 2   | 2   | 1   | 1    | 2    |
|                            | 6: The target users of the guideline are clearly defined.                                                     |                       | 5   | 3   | 4   | 3   | 2    | 5    |
| 3: Rigor of Development    | 7: Systematic methods were used to search for evidence.                                                       |                       | 1   | 2   | 6   | 6   | 2    | 3    |
|                            | 8: The criteria for selecting the evidence are clearly described.                                             |                       | 2   | 3   | 3   | 5   | 2    | 3    |
|                            | 9: . The strengths and limitations of the body of evidence are clearly described.                             |                       | 1   | 2   | 6   | 6   | 6    | 6    |
|                            | 10: The methods for formulating the recommendations are clearly described.                                    |                       | 1   | 1   | 3   | 2   | 1    | 2    |
|                            | 11: The health benefits, side effects, and risks have been considered in formulating the recommendations.     |                       | 5   | 3   | 3   | 6   | 6    | 4    |
|                            | 12: There is an explicit link between the recommendations and the supporting evidence.                        |                       | 5   | 4   | 6   | 5   | 5    | 6    |
|                            | 13: . The guideline has been externally reviewed by experts prior to its publication                          |                       | 3   | 3   | 4   | 6   | 6    | 6    |
|                            | 14: A procedure for updating the guideline is provided.                                                       |                       | 1   | 2   | 2   | 2   | 1    | 2    |
| 4: Clarity of Presentation | 15: The recommendations are specific and unambiguous.                                                         |                       | 5   | 4   | 5   | 6   | 7    | 7    |
|                            | 16: The different options for management of the condition or health issue are clearly presented.              |                       | 4   | 4   | 5   | 5   | 5    | 6    |
|                            | 17 :Key recommendations are easily identifiable.                                                              |                       | 5   | 4   | 6   | 7   | 7    | 6    |
| 5: Applicability           | 18: The guideline describes facilitators and barriers to its application.                                     |                       | 1   | 3   | 3   | 1   | 4    | 5    |
|                            | 19: The guideline provides advice and/or tools on how the recommendations can be put into practice.           |                       | 3   | 2   | 3   | 5   | 6    | 6    |
|                            | 20: The potential resource implications of applying the recommendations have been considered.                 |                       | 1   | 2   | 2   | 1   | 1    | 3    |
|                            | 21: The guideline presents monitoring and/or auditing criteria.                                               |                       | 4   | 3   | 4   | 6   | 6    | 5    |
| 6: Editorial Independence  | 22: The views of the funding body have not influenced the content of the guideline.                           |                       | 7   | 6   | 6   | 7   | 4    | 4    |
|                            | 23: Competing interests of guideline development group members have been recorded and addressed.              |                       | 7   | 6   | 6   | 7   | 7    | 6    |

Abbreviations: ACG, American college of gastroenterology; SBH, Brazilian society of hepatology; EASL, European association for the study of the liver. Domain scores calculated as instructed in AGREE II protocol.[26]
